# Supplementary material for: TIA and minor stroke: a qualitative study of long-term impact and experiences of follow-up care
Source: PubMed Central journal article supplement (PMC6918619; doi:10.1186/s12875-019-1057-x), 2019-12-17
Supplement: 12875_2019_1057_MOESM2_ESM.pdf [file 12875_2019_1057_MOESM2_ESM.pdf]

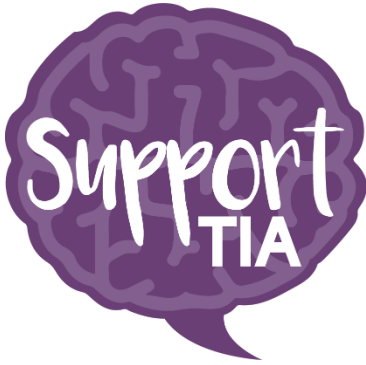

SUPPORT TIA: Structured follow-up pathway to improve ongoing impairments after TIA and minor stroke

Information about you

1. Are you:

Male Female Prefer not to say

2. What is your age? \_\_\_\_\_ Years

3. Are you currently employed?

Employed- Full time Unemployed
Employed- Part time Retired
Other, Please state \_\_\_\_\_

4. What is your ethnic group?

White Mixed/ multiple ethnic groups
Asian/ Asian British Black/ African/ Caribbean/ Black British
Other, Please state \_\_\_\_\_

7. How many mini strokes or minor strokes have you had? \_\_\_\_\_

8. What were the approximate date(s) of your mini stroke(s) or minor stroke(s)?

\_\_\_\_\_
\_\_\_\_\_

Thank you for taking the time to complete this questionnaire
