# Supplementary material for: TIA and minor stroke: a qualitative study of long-term impact and experiences of follow-up care
Source: PubMed Central journal article supplement (PMC6918619; doi:10.1186/s12875-019-1057-x), 2019-12-17
Supplement: 12875_2019_1057_MOESM3_ESM.pdf [file 12875_2019_1057_MOESM3_ESM.pdf]

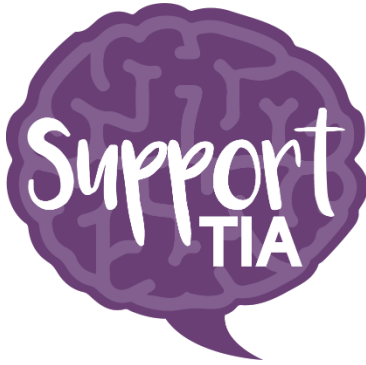

**SUPPORT TIA:** Structured follow-up pathway to improve ongoing impairments after TIA and minor stroke

**Information about you**

**1. Are you:**

Male     Female     Prefer not to say

**2. What is your age? \_\_\_\_\_ Years**

**3. Which healthcare sector do you work in?**

Primary care                       Secondary care  
 Community care                       Third/ voluntary sector  
 Other, Please state \_\_\_\_\_

**4. Which of the following best describes you?**

Doctor                                       Allied Health Professional  
 Nurse                                         Health worker  
 Volunteer                                       Other, Please state \_\_\_\_\_

**7. How many years of experience do you have as a healthcare provider/ volunteer?**

\_\_\_\_\_ Years

**8. Do you have any experience of working with TIA or minor stroke patients?**

Yes     No

**Thank you for taking the time to complete this questionnaire**
